# Supplementary material for: Anti-Phospholipid Antibodies and COVID-19 Thrombosis: A Co-Star, Not a Supporting Actor
Source: MDPI journal article supplement (doi:10.3390/biomedicines9080899), 2021-07-27
Supplement: s1 [file s1]

# Supplementary Material

**Table S1.** Prevalence of antiphospholipid antibodies in a group of anonymous blood donors compared to reference population and COVID-19 patients at the time of admission to the hospital. aPL, antiphospholipid antibody. B2GPI,  $\beta$ 2-glycoprotein-I. PS/PT, phosphatidylserine/prothrombin.

| Antibodies     | Blood Donors | Reference Population |         | COVID-19 Patients |         |
|----------------|--------------|----------------------|---------|-------------------|---------|
|                | (n = 320)    | (n = 143)            | p-value | (n = 360)         | p-value |
| Any aPL        | 15 (4,7%)    | 20 (14%)             | <0.001  | 63 (17.5%)        | <0.001  |
| Classic aPL    | 2 (0,6%)     | 4 (2.8%)             | 0.076   | 16 (4.4%)         | 0.002   |
| Anti-B2GPI IgA | 4 (1,3%)     | 9 (6.3%)             | 0.004   | 40 (11.1%)        | <0.001  |
| Anti-PS/PT     | 10 (3,1%)    | 7 (4.9%)             | 0.394   | 15 (4.2%)         | 0.471   |

**Table S2.** Outputs during the follow-up in patients with antiphospholipid antibodies \* calculated in comparison with the rest of the patients. B2GPI,  $\beta$ 2-glycoprotein-I, CL, cardiolipin. PS/PT, phosphatidylserine/prothrombin.

| Antibodies                        | First Sample |         | <i>p</i> -value* | Second Sample |         | <i>p</i> -value* |
|-----------------------------------|--------------|---------|------------------|---------------|---------|------------------|
| Patients with Thrombotic Events   |              |         |                  |               |         |                  |
| Any aPL                           | 10           | (15.9%) | 0.107            | 13            | (20.6%) | 0.003            |
| Classic aPL                       | 5            | (31.3%) | 0.016            | 5             | (33.3%) | 0.012            |
| Anti-B2GPI IgA                    | 6            | (15%)   | 0.297            | 8             | (19%)   | 0.046            |
| Anti-PS/PT                        | 4            | (26.7%) | 0.056            | 5             | (31.3%) | 0.016            |
| Patients with Ventilatory Failure |              |         |                  |               |         |                  |
| Any aPL                           | 13           | (20.6%) | 0.214            | 12            | (19%)   | 0.120            |
| Classic aPL                       | 2            | (12.5%) | 0.253            | 1             | (6.7%)  | 0.093            |
| Anti-B2GPI IgA                    | 9            | (22.5%) | 0.502            | 8             | (19%)   | 0.220            |
| Anti-PS/PT                        | 3            | (20%)   | 0.768            | 3             | (18.8%) | 0.572            |
| Patients Treated in ICU           |              |         |                  |               |         |                  |
| Any aPL                           | 5            | (7.9%)  | 0.649            | 6             | (9.5%)  | 0.828            |
| Classic aPL                       | 1            | (6.3%)  | 1                | 1             | (6.7%)  | 1                |
| Anti-B2GPI IgA                    | 4            | (10%)   | 1                | 4             | (9.5%)  | 1                |
| Anti-PS/PT                        | 0            | (0%)    | 0.382            | 1             | (6.3%)  | 1                |

**Table S3.** Time of appearance of the first thrombotic event (from hospital admission), depending on the presence of antiphospholipid antibodies. B2GPI,  $\beta$ 2-glycoprotein-I, CL, cardiolipin. PS/PT, phosphatidylserine/prothrombin. \* Median difference, p-values and Median difference index were calculated in comparison with aPL negative patients.

| Antibodies       | Mean   | Median | IQR       | Hodges-Lehmann     | p-value* | Median            |
|------------------|--------|--------|-----------|--------------------|----------|-------------------|
|                  | (Days) | (Days) |           | Median Difference* |          | Difference Index* |
| aPL negative     | 6.3    | 4      | (2.5–7)   | -                  | -        | -                 |
| Any aPL positive | 29.1   | 9      | (6–25)    | 5                  | 0.006    | 1.25              |
| Classic aPL      | 37.2   | 6      | (4–51)    | -                  | 0.309    | -                 |
| Anti-B2GPI IgA   | 30     | 12.5   | (7–21)    | 6                  | 0.024    | 1.5               |
| Anti-PS/PT       | 57.2   | 28     | (4.8–109) | -                  | 0.092    | -                 |

**Table S4.** Logistic regression multivariate analysis of thrombosis associated factors. The variable APL-positivity has been divided into the three types of aPL: classic aPL, IgA anti-B2GPI and Anti-PS/ PT.

| Variable            | Odds Ratio | 95%CI     | <i>p</i> -value |
|---------------------|------------|-----------|-----------------|
| First Serum Sample  |            |           |                 |
| Classic aPL         | 3.98       | 1.19–3.35 | 0.025           |
| Anti-B2GPI IgA      | 1.68       | 0.58–4.84 | 0.341           |
| Any anti-PS/PT      | 2.77       | 0.75–0.26 | 0.127           |
| Hypertension        | 0.51       | 0.21–1.22 | 0.13            |
| Age years           | 0.98       | 0.96–1    | 0.07            |
| Second Serum Sample |            |           |                 |
| Classic aPL         | 3.65       | 1–3.29    | 0.049           |
| Anti-B2GPI IgA      | 2.67       | 1.02–7    | 0.046           |
| Any anti-PS/PT      | 3.16       | 0.9–1.08  | 0.072           |
| Hypertension        | 0.46       | 0.19–1.12 | 0.087           |
| Age years           | 0.98       | 0.96–1    | 0.082           |

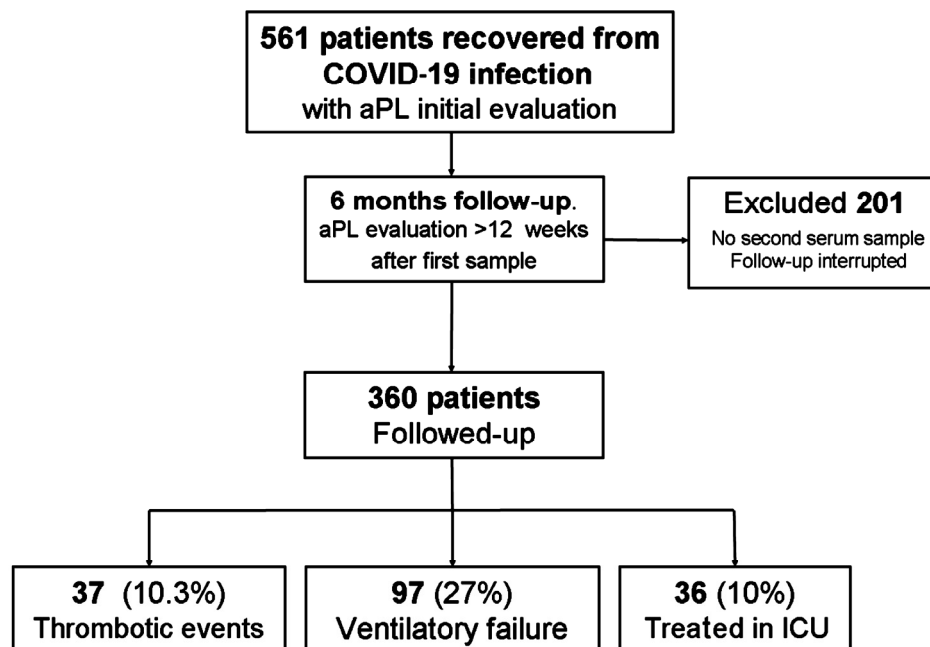

**Figure S1.** Algorithm of disposition and outcomes.

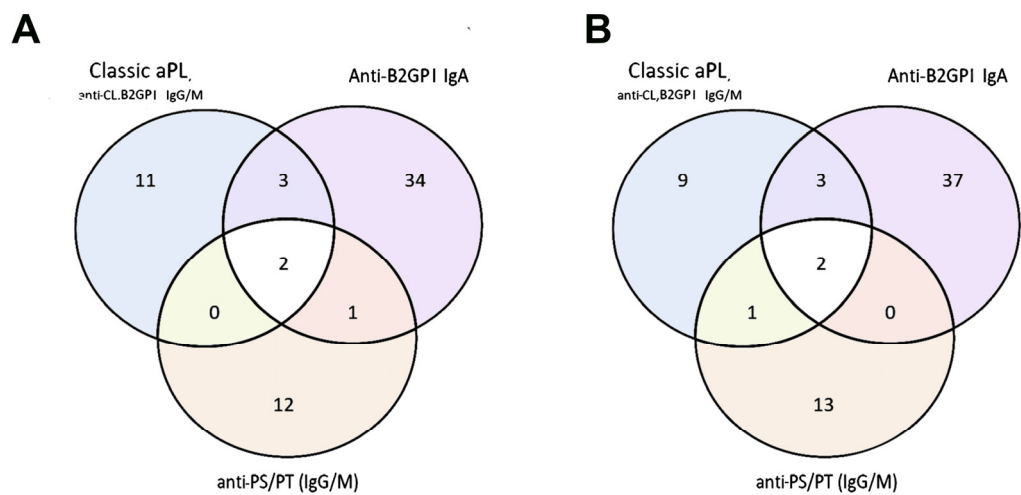

**Figure S2.** Number and type of aPL positivity in the COVID-19 patients. A. First serum sample. B. Second serum sample. B2GPI,  $\beta$ 2-glycoprotein-I, CL, cardiolipin. PS/PT, phosphatidylserine/prothrombin.
